# Supplementary material for: In Silico Identification and Analysis of Proteins Containing the Phox Homology Phosphoinositide-Binding Domain in Kinetoplastea Protists: Evolutionary Conservation and Uniqueness of Phox-Homology-Domain-Containing Protein Architectures
Source: Int J Mol Sci. 2023 Jul 15;24(14):11521. doi: 10.3390/ijms241411521 (PMC10380299; doi:10.3390/ijms241411521)
Supplement: Supplementary file 1 [file ijms-24-11521-s001.zip › Supplementary Table S1.xlsx]

## Sheet: FINAL 170
Supplementary Table 1: The 170 Kinetoplastea PX-proteins classified into five subfamilies according to their domain architecture
Entry	Subfamily	1st domain	2nd domain	3rd domain	predicted additional domain	E-value	Score	Organism	Length (amino acids)	Mass (Da)
A0A061J1E1	A	PX				5.6e-36	117.3	Trypanosoma rangeli SC58	488	55670
A0A088RMZ2	A	PX				4.3e-42	137.1	Leishmania panamensis	454	51289
A0A0N0DTB2	A	PX				3.2e-45	147.3	Leptomonas pyrrhocoris	581	64561
A0A0N1HW83	A	PX				7.9e-46	149.2	Leptomonas seymouri	582	64293
A0A0S4ISM7	A	PX			px	4.3e-30	98.2	Bodo saltans (Flagellated protozoan)	536	60976
A0A0S4ITC8	A	PX				1.3e-20	67.4	Bodo saltans (Flagellated protozoan)	314	34999
A0A0S4IZJ1	A	PX				9e-31	100.4	Bodo saltans (Flagellated protozoan)	562	62292
A0A0S4JBH5	A	PX				4.8e-20	65.7	Bodo saltans (Flagellated protozoan)	805	86992
A0A0S4JU41	A	PX				5.8e-18	58.9	Bodo saltans (Flagellated protozoan)	440	48393
A0A0S4JV09	A	PX			px	2.5e-29	95.8	Bodo saltans (Flagellated protozoan)	302	34404
A0A0S4KMG1	A	PX				1.5e-27	90	Bodo saltans (Flagellated protozoan)	600	67157
A0A1E1IRS0	A	PX				4.6e-47	153.2	Leishmania guyanensis	572	63538
A0A1G4I280	A	PX				4.7e-36	117.6	Trypanosoma equiperdum	471	52988
A0A1G4IHR1	A	PX				1.4e-44	145.2	Trypanosoma equiperdum	528	58429
A0A1X0NNE1	A	PX				2.8e-09	30.8	Trypanosoma theileri	370	40740
A0A1X0NNT5	A	PX				3.5e-41	134.2	Trypanosoma theileri	564	62643
A0A1X0P2S5	A	PX				4.7e-26	85.1	Trypanosoma theileri	610	69099
A0A1X0P5L8	A	PX				7.1e-15	48.9	Trypanosoma theileri	611	69783
A0A1X0PA65	A	PX				3.3e-33	108.3	Trypanosoma theileri	487	55963
A0A2V2VA52	A	PX				4.5e-47	153.3	Trypanosoma cruzi	498	55784
A0A2V2VGR3	A	PX				4.6e-47	153.3	Trypanosoma cruzi	498	55791
A0A2V2VNB6	A	PX				1.8e-36	118.9	Trypanosoma cruzi	489	56472
A0A2V2VUF8	A	PX				1.9e-36	118.9	Trypanosoma cruzi	489	56622
A0A2V2X1B9	A	PX				8e-47	152.5	Trypanosoma cruzi	498	55817
A0A2V2X5G7	A	PX				1.8e-36	118.9	Trypanosoma cruzi	489	56465
A0A2V2XC02	A	PX				0.00018	15.1	Trypanosoma cruzi	728	81732
A0A3L6L4U9	A	PX				1.4e-44	145.2	Trypanosoma brucei equiperdum	528	58429
A0A3L6LFT2	A	PX				4.8e-36	117.5	Trypanosoma brucei equiperdum	471	53019
A0A3P3Z1A4	A	PX				8.5e-42	136.2	Leishmania braziliensis MHOM/BR/75/M2904	454	51286
A0A3R7LA20	A	PX				7.6e-43	139.6	Trypanosoma rangeli	493	54872
A0A3R7MPZ5	A	PX				2.2e-36	118.6	Trypanosoma rangeli	488	55427
A0A3R7NCD4	A	PX				9.4e-11	35.5	Trypanosoma rangeli	374	40883
A0A3S7WSS9	A	PX				5.8e-43	139.9	Leishmania donovani	454	50942
A0A422PZG9	A	PX				3.6e-24	79	Trypanosoma conorhini	600	66734
A0A422Q9D5	A	PX				2e-35	115.5	Trypanosoma conorhini	490	55467
A0A422QAE2	A	PX				1.8e-44	144.9	Trypanosoma conorhini	500	55181
A0A422QAI0	A	PX				4e-11	36.7	Trypanosoma conorhini	368	39821
A0A504XCY2	A	PX				2.6e-48	157.3	Leishmania donovani	571	63011
A0A504Y5F1	A	PX				5.5e-48	156.2	Leishmania donovani	571	63051
A0A640KD33	A	PX				1.7e-43	141.7	Leishmania tarentolae (Sauroleishmania tarentolae)	453	50992
A0A6J8F686	A	PX				5.8e-43	139.9	Leishmania donovani	454	50972
A0A6U4YAE1	A	PX				5.1e-26	85	Neobodo designis (Flagellated protozoan) (Bodo designis)	239	26430
A0A7G2CLV8	A	PX				2.5e-24	79.5	Angomonas deanei	476	53799
A0A7J6XXM0	A	PX				9.1e-22	71.2	Trypanosoma cruzi	927	102241
A0A7J6Y5Z1	A	PX				3.2e-12	40.3	Trypanosoma cruzi	366	40309
A0A7J6YC75	A	PX				1.8e-36	118.9	Trypanosoma cruzi	489	56462
A4H7I2	A	PX				8.5e-42	136.2	Leishmania braziliensis	454	51286
A4HVW4	A	PX				5.8e-43	139.9	Leishmania infantum	454	50942
C9ZLQ6	A	PX				4.8e-36	117.5	Trypanosoma brucei gambiense (strain MHOM/CI/86/DAL972)	471	53019
C9ZT62	A	PX				1.4e-44	145.2	Trypanosoma brucei gambiense (strain MHOM/CI/86/DAL972)	528	58429
E9APL5	A	PX				4.6e-43	140.3	Leishmania mexicana (strain MHOM/GT/2001/U1103)	454	51008
E9BBQ7	A	PX				2.7e-43	141	Leishmania donovani (strain BPK282A1)	454	50932
F9WCA9	A	PX				1.3e-34	112.8	Trypanosoma congolense (strain IL3000)	486	54707
F9WHP7	A	PX				5.6e-35	114.1	Trypanosoma congolense (strain IL3000)	305	34149
G0TTT6	A	PX				5.3e-33	107.6	Trypanosoma vivax (strain Y486)	486	55061
G0TYS5	A	PX				3.9e-44	143.8	Trypanosoma vivax (strain Y486)	539	60515
G0UQ98	A	PX				2.1e-43	141.4	Trypanosoma congolense (strain IL3000)	365	40113
K2LXS1	A	PX				7.2e-13	42.4	Trypanosoma cruzi marinkellei	366	40575
K2MV78	A	PX				2.3e-22	73.2	Trypanosoma cruzi marinkellei	828	89746
K2N1F1	A	PX				3.3e-46	150.5	Trypanosoma cruzi marinkellei	498	55772
K2N6W1	A	PX				1.8e-36	118.9	Trypanosoma cruzi marinkellei	489	57004
K2NBW3	A	PX				6.8e-24	78.1	Trypanosoma cruzi marinkellei	576	65227
K2NRG5	A	PX			px	1.3e-52	171.2	Trypanosoma cruzi marinkellei	589	65842
Q4CPU2	A	PX				4e-22	72.4	Trypanosoma cruzi (strain CL Brener)	676	74639
Q4D7E0	A	PX				3.2e-12	40.3	Trypanosoma cruzi (strain CL Brener)	366	40322
Q4D9P9	A	PX				0.00018	15.1	Trypanosoma cruzi (strain CL Brener)	728	81732
Q4DES5	A	PX				0.00017	15.2	Trypanosoma cruzi (strain CL Brener)	727	81806
Q4DJ38	A	PX				4.5e-47	153.3	Trypanosoma cruzi (strain CL Brener)	498	55840
Q4DSP7	A	PX				3.6e-12	40.1	Trypanosoma cruzi (strain CL Brener)	366	40241
Q4DTI9	A	PX				1.8e-36	118.9	Trypanosoma cruzi (strain CL Brener)	489	56472
Q4DUX3	A	PX				4.5e-47	153.3	Trypanosoma cruzi (strain CL Brener)	498	55784
Q4E369	A	PX				3.3e-22	72.7	Trypanosoma cruzi (strain CL Brener)	877	95827
Q4QFW3	A	PX				4.7e-43	140.3	Leishmania major	454	50999
Q57X66	A	PX				1.4e-44	145.2	Trypanosoma brucei brucei (strain 927/4 GUTat10.1)	528	58429
Q57ZY9	A	PX				4.7e-36	117.6	Trypanosoma brucei brucei (strain 927/4 GUTat10.1)	471	52988
S9TJB1	A	PX				5.3e-11	36.3	Strigomonas culicis	357	40061
S9UF93	A	PX			vps5	1.1e-27	90.4	Strigomonas culicis	421	48067
S9V6F4	A	PX			vps5	5.7e-26	84.9	Angomonas deanei	385	43922
S9VAW7	A	PX			vps5	1.1e-27	90.4	Strigomonas culicis	421	48081
V5B677	A	PX				1.9e-33	109.1	Trypanosoma cruzi Dm28c	479	55459
V5B8V6	A	PX				0.00015	15.4	Trypanosoma cruzi Dm28c	735	82888
V5BCZ4	A	PX				3e-23	76	Trypanosoma cruzi Dm28c	537	59336
V5BG10	A	PX				3.6e-12	40.1	Trypanosoma cruzi Dm28c	366	40502
V5BMA1	A	PX				4.5e-47	153.3	Trypanosoma cruzi Dm28c	498	55804
W6KPD0	A	PX				1.4e-40	132.3	Phytomonas sp. isolate EM1	512	59138
W6L5R0	A	PX				7.8e-39	126.6	Phytomonas sp. isolate Hart1	505	57781
A0A7J6YHX8	A	PX				0.00018	15.2	Trypanosoma cruzi	728	81723
A0A1X0NKZ7	B	PX	PX			2e-47	154.5	Trypanosoma theileri	607	67851
A0A2V2V2E1	B	PX	PX			7e-56	181.8	Trypanosoma cruzi	584	65586
A0A2V2VFT3	B	PX	PX			1.6e-55	180.6	Trypanosoma cruzi	589	66063
A0A2V2WEX7	B	PX	PX			6.2e-54	175.5	Trypanosoma cruzi	590	66109
A0A3R7L2S8	B	PX	PX			4.7e-53	172.7	Trypanosoma conorhini	593	63980
A0A422NLT1	B	PX	PX			2.1e-50	164.1	Trypanosoma rangeli	597	65789
A0A7J6Y303	B	PX	PX			1.5e-53	174.3	Trypanosoma cruzi	591	66376
Q4DW43	B	PX	PX			6.2e-54	175.5	Trypanosoma cruzi (strain CL Brener)	590	66109
V5BFS0	B	PX	PX			7e-56	181.8	Trypanosoma cruzi Dm28c	584	65586
A0A061ITV6	B	PX	PX			9e-47	152.3	Trypanosoma rangeli SC58	673	74318
A0A2V2W8J5	C	PX	Pkinase			0.00013	15.6	Trypanosoma cruzi	1.177	127793
A0A2V2XB58	C	PX	Pkinase			3.3e-05	17.6	Trypanosoma cruzi	1.178	127899
A0A7J6YHC1	C	PX	Pkinase			3.3e-05	17.6	Trypanosoma cruzi	1.178	127888
K2NGF6	C	PX	Pkinase			0.00015	15.4	Trypanosoma cruzi marinkellei	1.182	128981
Q4CZQ9	C	PX	Pkinase			3.3e-05	17.6	Trypanosoma cruzi (strain CL Brener)	1.178	127899
Q4DDT8	C	PX	Pkinase			0.00013	15.6	Trypanosoma cruzi (strain CL Brener)	1.177	127793
A0A061J7Y8	D	PX	Pkinase	Lipocalin_5		1.5e-37	122.4	Trypanosoma rangeli SC58	869	98376
A0A088RUI6	D	PX	Pkinase	Lipocalin_5		5.3e-39	127.1	Leishmania panamensis	1.297	140337
A0A0N0VHJ3	D	PX	Pkinase	Lipocalin_5		8.5e-39	126.4	Leptomonas pyrrhocoris	1.309	141499
A0A0N1IMC0	D	PX	Pkinase	Lipocalin_5		3.8e-38	124.3	Leptomonas seymouri	1.317	142731
A0A0S4JU56	D	PX	Pkinase	Lipocalin_5		1.3e-15	51.3	Bodo saltans (Flagellated protozoan)	1.135	125098
A0A1E1J095	D	PX	Pkinase	Lipocalin_5		5.4e-39	127.1	Leishmania guyanensis	1.313	141975
A0A1G4I7W9	D	PX	Pkinase	Lipocalin_5		3.5e-39	127.7	Trypanosoma equiperdum	858	96766
A0A1X0NSM0	D	PX	Pkinase	Lipocalin_5		2.8e-33	108.5	Trypanosoma theileri	931	105884
A0A2V2W234	D	PX	Pkinase	Lipocalin_5		8.5e-39	126.4	Trypanosoma cruzi	858	97947
A0A2V2WM36	D	PX	Pkinase	Lipocalin_5		2.5e-39	128.2	Trypanosoma cruzi	858	97924
A0A2V2XFU5	D	PX	Pkinase	Lipocalin_5		2.4e-39	128.2	Trypanosoma cruzi	857	97969
A0A3L6KSS2	D	PX	Pkinase	Lipocalin_5		3.5e-39	127.7	Trypanosoma brucei equiperdum	858	96780
A0A3P3ZB12	D	PX	Pkinase	Lipocalin_5		5.4e-39	127.1	Leishmania braziliensis MHOM/BR/75/M2904	1.306	141488
A0A3Q8IQN3	D	PX	Pkinase	Lipocalin_5		1.3e-39	129.1	Leishmania donovani	1.323	142384
A0A3R7LMC9	D	PX	Pkinase	Lipocalin_5		2.8e-38	124.7	Trypanosoma conorhini	872	98448
A0A3R7N046	D	PX	Pkinase	Lipocalin_5		8.9e-39	126.4	Trypanosoma rangeli	868	98303
A0A504WX74	D	PX	Pkinase	Lipocalin_5		1.3e-39	129.1	Leishmania donovani	1.323	142252
A0A504Y0S9	D	PX	Pkinase	Lipocalin_5		1.2e-39	129.2	Leishmania donovani	1.323	142463
A0A640KLF8	D	PX	Pkinase	Lipocalin_5		1.2e-37	122.8	Leishmania tarentolae (Sauroleishmania tarentolae)	1.323	143986
A0A7J6Y2V8	D	PX	Pkinase	Lipocalin_5		2.7e-39	128	Trypanosoma cruzi	928	106101
A4HGM1	D	PX	Pkinase	Lipocalin_5		5.4e-39	127.1	Leishmania braziliensis	1.313	142289
A4I3P6	D	PX	Pkinase	Lipocalin_5		1.3e-39	129.1	Leishmania infantum	1.323	142378
D0A8B7	D	PX	Pkinase	Lipocalin_5		3.5e-39	127.7	Trypanosoma brucei gambiense (strain MHOM/CI/86/DAL972)	858	96780
E9AZY7	D	PX	Pkinase	Lipocalin_5		8.7e-40	129.7	Leishmania mexicana (strain MHOM/GT/2001/U1103)	1.322	143017
E9BJQ1	D	PX	Pkinase	Lipocalin_5		1.2e-39	129.2	Leishmania donovani (strain BPK282A1)	1.323	142463
G0UCE3	D	PX	Pkinase	Lipocalin_5		1.1e-33	109.9	Trypanosoma vivax (strain Y486)	859	96272
G0V1H9	D	PX	Pkinase	Lipocalin_5		2.2e-38	125.1	Trypanosoma congolense (strain IL3000)	877	98868
K2NTY1	D	PX	Pkinase	Lipocalin_5		2.1e-39	128.4	Trypanosoma cruzi marinkellei	852	97177
Q384A2	D	PX	Pkinase	Lipocalin_5		3.5e-39	127.7	Trypanosoma brucei brucei (strain 927/4 GUTat10.1)	858	96780
Q4DXB5	D	PX	Pkinase	Lipocalin_5		2.7e-39	128	Trypanosoma cruzi (strain CL Brener)	928	106125
Q4Q898	D	PX	Pkinase	Lipocalin_5		4.6e-39	127.3	Leishmania major	1.323	142407
Q965D1	D	PX	Pkinase	Lipocalin_5		8.7e-38	123.2	Trypanosoma brucei brucei	858	96731
V5BFB5	D	PX	Pkinase	Lipocalin_5		8.6e-39	126.4	Trypanosoma cruzi Dm28c	858	97929
W6KMR7	D	PX	Pkinase	Lipocalin_5		7.8e-35	113.6	Phytomonas sp. isolate EM1	1.166	131173
W6L5D5	D	PX	Pkinase	Lipocalin_5		4.6e-34	111.1	Phytomonas sp. isolate Hart1	1.164	130954
A0A061JAH9	E	PX	Vps5			2e-40	131.7	Trypanosoma rangeli SC58	422	48055
A0A088S0S0	E	PX	Vps5			7.6e-34	110.4	Leishmania panamensis	418	46694
A0A0N0E0A2	E	PX	Vps5			1.5e-33	109.4	Leptomonas pyrrhocoris	427	47402
A0A0N1IBS5	E	PX	Vps5			5.1e-34	110.9	Leptomonas seymouri	426	47667
A0A0S4KLA7	E	PX	Vps5			2.7e-40	131.3	Bodo saltans (Flagellated protozoan)	409	46804
A0A1E1J645	E	PX	Vps5			7.6e-34	110.4	Leishmania guyanensis	418	46694
A0A1G4I1C1	E	PX	Vps5			1.3e-37	122.7	Trypanosoma equiperdum	439	50368
A0A1X0P5K9	E	PX	Vps5			4.5e-35	114.4	Trypanosoma theileri	415	47921
A0A2V2W207	E	PX	Vps5			4.8e-41	133.7	Trypanosoma cruzi	422	48291
A0A2V2WND1	E	PX	Vps5			5.8e-41	133.5	Trypanosoma cruzi	422	48359
A0A2V2XM59	E	PX	Vps5			6e-41	133.4	Trypanosoma cruzi	422	48264
A0A3L6L560	E	PX	Vps5			1.1e-37	122.8	Trypanosoma brucei equiperdum	419	48172
A0A3P3ZGX6	E	PX	Vps5			7.6e-34	110.4	Leishmania braziliensis MHOM/BR/75/M2904	418	46726
A0A3Q8IV97	E	PX	Vps5			6.5e-34	110.6	Leishmania donovani	417	46613
A0A3R7L2W7	E	PX	Vps5			8.7e-42	136.1	Trypanosoma rangeli	422	48134
A0A3R7LFH1	E	PX	Vps5			3.6e-41	134.2	Trypanosoma conorhini	422	48087
A0A504X805	E	PX	Vps5			6.5e-34	110.6	Leishmania donovani	417	46583
A0A640KYX8	E	PX	Vps5			1.2e-32	106.5	Leishmania tarentolae (Sauroleishmania tarentolae)	418	47066
A4HMR6	E	PX	Vps5			7.6e-34	110.4	Leishmania braziliensis	418	46726
A4IBF2	E	PX	Vps5			6.4e-34	110.6	Leishmania infantum	417	46556
C9ZZB2	E	PX	Vps5			1.1e-37	122.8	Trypanosoma brucei gambiense (strain MHOM/CI/86/DAL972)	419	48172
E9AF66	E	PX	Vps5			6e-34	110.7	Leishmania major	417	46559
E9B6C2	E	PX	Vps5			6.6e-34	110.6	Leishmania mexicana (strain MHOM/GT/2001/U1103)	418	46658
E9BSB7	E	PX	Vps5			6.5e-34	110.6	Leishmania donovani (strain BPK282A1)	417	46583
G0U3I8	E	PX	Vps5			5.7e-32	104.3	Trypanosoma vivax (strain Y486)	249	28771
K2NRQ0	E	PX	Vps5			4.3e-41	133.9	Trypanosoma cruzi marinkellei	422	48228
Q38D86	E	PX	Vps5			1.1e-37	122.8	Trypanosoma brucei brucei (strain 927/4 GUTat10.1)	419	48172
Q4D6U6	E	PX	Vps5			6e-41	133.4	Trypanosoma cruzi (strain CL Brener)	422	48264
Q4DS34	E	PX	Vps5			5.8e-41	133.5	Trypanosoma cruzi (strain CL Brener)	422	48359
V5B3T2	E	PX	Vps5			4.8e-41	133.7	Trypanosoma cruzi Dm28c	422	48291
W6L4Q5	E	PX	Vps5			1.8e-28	93	Phytomonas sp. isolate Hart1	396	44456
F9W5Y5	E	PX	BAR_3_WASP_bdg			1.5e-38	125.6	Trypanosoma congolense (strain IL3000)	303	34752
