# Supplementary material for: In Silico Identification and Analysis of Proteins Containing the Phox Homology Phosphoinositide-Binding Domain in Kinetoplastea Protists: Evolutionary Conservation and Uniqueness of Phox-Homology-Domain-Containing Protein Architectures
Source: Int J Mol Sci. 2023 Jul 15;24(14):11521. doi: 10.3390/ijms241411521 (PMC10380299; doi:10.3390/ijms241411521)
Supplement: Supplementary file 1 [file ijms-24-11521-s001.zip › Supplementary Table S2.xlsx]

## Sheet: pxpkinaselipocali
Supplementary Table 2: Proteins retrieved from Uniprot after a search for homologues to each PX-Pkinase-Lipocalin_5 protein of subfamily C
Accession	Source Database	Name	Tax ID	Tax Name	Length
A4HGM1	unreviewed	Zinc finger protein kinase-like	5660	Leishmania braziliensis	1313
A0A3P3ZB12	unreviewed	Zinc finger protein kinase-like	420245	Leishmania braziliensis MHOM/BR/75/M2904	1306
A0A3Q8IQN3	unreviewed	Zinc finger protein kinase-like	5661	Leishmania donovani	1323
A0A504WX74	unreviewed	Zinc finger protein kinase-like	5661	Leishmania donovani	1323
A0A504Y0S9	unreviewed	Zinc finger protein kinase-like	5661	Leishmania donovani	1323
E9BJQ1	unreviewed	Zinc finger protein kinase-like	981087	Leishmania donovani (strain BPK282A1)	1323
A0A836KLL2	unreviewed	Zinc finger protein kinase-like	5663	Leishmania enriettii	1325
A0A1E1J095	unreviewed	Zinc finger protein kinase-like	5670	Leishmania guyanensis	1313
A0A6L0XIN5	unreviewed	Zinc finger protein kinase-like	5671	Leishmania infantum	1323
A4I3P6	unreviewed	Zinc finger protein kinase-like	5671	Leishmania infantum	1323
Q4Q898	unreviewed	Zinc finger protein kinase-like	5664	Leishmania major	1323
A0A836KIT1	unreviewed	Zinc finger protein kinase-like	1580590	Leishmania martiniquensis	1329
E9AZY7	unreviewed	Zinc finger protein kinase-like	929439	Leishmania mexicana (strain MHOM/GT/2001/U1103)	1322
A0A836HD92	unreviewed	Zinc finger protein kinase-like	2249476	Leishmania orientalis	1327
A0A088RUI6	unreviewed	Zinc finger protein kinase-like	5679	Leishmania panamensis	1297
A0A836L9A1	unreviewed	Zinc finger protein kinase-like	2803181	Leishmania sp. Ghana 2012 LV757	1327
A0A836I4V3	unreviewed	Zinc finger protein kinase-like	2802991	Leishmania sp. Namibia	1327
A0A640KLF8	unreviewed	Zinc finger protein kinase-like	5689	Leishmania tarentolae	1323
A0A0N0VHJ3	unreviewed	Putative zinc finger protein kinase	157538	Leptomonas pyrrhocoris	1309
A0A0N1IMC0	unreviewed	Zinc finger protein kinase-like	5684	Leptomonas seymouri	1317
W6KMR7	unreviewed	Protein kinase domain-containing protein	479712	Phytomonas sp. EM1	1166
W6L5D5	unreviewed	Protein kinase domain-containing protein	223615	Phytomonas sp. Hart1	1164
A0A836L874	unreviewed	Uncharacterized protein	2761500	Porcisia hertigi (belong to the Paraleishmania)	1284
Q965D1	unreviewed	Protein kinase	5702	Trypanosoma brucei brucei	858
Q384A2	unreviewed	Protein kinase	185431	Trypanosoma brucei brucei (strain 927/4 GUTat10.1)	858
A0A3L6KSS2	unreviewed	Protein kinase	630700	Trypanosoma brucei equiperdum	858
D0A8B7	unreviewed	Protein kinase	679716	Trypanosoma brucei gambiense (strain MHOM/CI/86/DAL972)	858
G0V1H9	unreviewed	Protein kinase	1068625	Trypanosoma congolense (strain IL3000)	877
A0A3R7LMC9	unreviewed	Protein kinase	83891	Trypanosoma conorhini	872
A0A2V2W234	unreviewed	Protein kinase	5693	Trypanosoma cruzi	858
A0A2V2WM36	unreviewed	Protein kinase	5693	Trypanosoma cruzi	858
A0A2V2XFU5	unreviewed	Protein kinase	5693	Trypanosoma cruzi	857
A0A7J6Y2V8	unreviewed	Rac serine-threonine kinase	5693	Trypanosoma cruzi	928
Q4DXB5	unreviewed	Protein kinase	353153	Trypanosoma cruzi (strain CL Brener)	928
V5BFB5	unreviewed	Protein kinase	1416333	Trypanosoma cruzi Dm28c	858
K2NTY1	unreviewed	Protein kinase	85056	Trypanosoma cruzi marinkellei	852
A0A1G4I7W9	unreviewed	Protein kinase	5694	Trypanosoma equiperdum	858
A0A3R7N046	unreviewed	Protein kinase	5698	Trypanosoma rangeli	868
A0A061J7Y8	unreviewed	Protein kinase	429131	Trypanosoma rangeli SC58	869
A0A1X0NSM0	unreviewed	Protein kinase	67003	Trypanosoma theileri	931
G0UCE3	unreviewed	Protein kinase	1055687	Trypanosoma vivax (strain Y486)	859
