# Supplementary material for: In Silico Identification and Analysis of Proteins Containing the Phox Homology Phosphoinositide-Binding Domain in Kinetoplastea Protists: Evolutionary Conservation and Uniqueness of Phox-Homology-Domain-Containing Protein Architectures
Source: Int J Mol Sci. 2023 Jul 15;24(14):11521. doi: 10.3390/ijms241411521 (PMC10380299; doi:10.3390/ijms241411521)
Supplement: Supplementary file 1 [file ijms-24-11521-s001.zip › Supplementary Table S3.xlsx]

## Sheet: pxpx
Supplementary Table 3: Proteins retrieved from Uniprot after a search for homologues to each PX-PX protein of subfamily B
Accession	Source Database	Name	Tax ID	Tax Name	Length
A0A2R6QFX9	unreviewed	PX domain-containing protein	1590841	Actinidia chinensis var. chinensis	842
A0A814PP23	unreviewed	PX domain-containing protein	433720	Adineta steineri	276
A0A8J1W1I1	unreviewed	PX domain-containing protein	2202890	Amoebophrya sp. A120	825
A0A8J2BAB9	unreviewed	PX domain-containing protein	1410381	Amoebophrya sp. A25	709
A0A7S0DK78	unreviewed	PX domain-containing protein	1561963	Amorphochlora amoebiformis	262
A0A368F8G7	unreviewed	PX domain-containing protein	29170	Ancylostoma caninum	275
A0A6G0WFU1	unreviewed	sphingomyelin phosphodiesterase	100861	Aphanomyces euteiches	1400
A0A087SRS2	unreviewed	PX domain-containing protein	3075	Auxenochlorella protothecoides	367
A0A8S9GJZ0	unreviewed	PX domain-containing protein	69181	Brassica cretica	933
A0A8S9STD5	unreviewed	PX domain-containing protein	69181	Brassica cretica	914
A0A0D2VSX0	unreviewed	PX domain-containing protein	595528	Capsaspora owczarzaki (strain ATCC 30864)	629
A0A0M0JRX7	unreviewed	PX domain-containing protein	1460289	Chrysochromulina tobinii	779
G0R404	unreviewed	PX domain-containing protein	857967	Ichthyophthirius multifiliis (strain G5)	277
A0A7S2TJ91	unreviewed	PX domain-containing protein	641309	Lotharella oceanica	262
A0A1B0GHA0	unreviewed	PX domain-containing protein	7200	Lutzomyia longipalpis	254
G7PRN3	unreviewed	PX domain-containing protein	9541	Macaca fascicularis	526
A0A0D2N1G3	unreviewed	PX domain-containing protein	145388	Monoraphidium neglectum	1136
A0A0N4YBP5	unreviewed	PX domain-containing protein	27835	Nippostrongylus brasiliensis	181
A0A7S1AB99	unreviewed	PX domain-containing protein	2966	Noctiluca scintillans	340
A0A7S2QSR2	unreviewed	PX domain-containing protein	552664	Norrisiella sphaerica	273
A0A662XUW0	unreviewed	PX domain-containing protein	2483409	Nothophytophthora sp. Chile5	491
A0A662XZ29	unreviewed	PX domain-containing protein	2483409	Nothophytophthora sp. Chile5	396
J9IQ40	unreviewed	PX domain-containing protein	1172189	Oxytricha trifallax	1464
J9J020	unreviewed	PX domain-containing protein	1172189	Oxytricha trifallax	678
A0A8S1S8X0	unreviewed	PX domain-containing protein	43137	Paramecium octaurelia	635
A0A8S1SI98	unreviewed	PX domain-containing protein	43137	Paramecium octaurelia	634
A0A8S1SIC9	unreviewed	PX domain-containing protein	43137	Paramecium octaurelia	656
A0A8S1SS18	unreviewed	PX domain-containing protein	43137	Paramecium octaurelia	654
A0A8S1T0D0	unreviewed	PX domain-containing protein	43137	Paramecium octaurelia	780
A0A8S1T323	unreviewed	PX domain-containing protein	43137	Paramecium octaurelia	319
A0A8S1TWF5	unreviewed	PX domain-containing protein	43137	Paramecium octaurelia	837
A0A8S1U3Q4	unreviewed	PX domain-containing protein	43137	Paramecium octaurelia	343
A0A8S1UGL0	unreviewed	PX domain-containing protein	43137	Paramecium octaurelia	322
A0A8S1UMT3	unreviewed	PX domain-containing protein	43137	Paramecium octaurelia	318
A0A8S1UNB9	unreviewed	PX domain-containing protein	43137	Paramecium octaurelia	317
A0A8S1UVG2	unreviewed	PX domain-containing protein	43137	Paramecium octaurelia	320
A0A8S1V8A3	unreviewed	PX domain-containing protein	43137	Paramecium octaurelia	316
A0A8S1VPM6	unreviewed	PX domain-containing protein	43137	Paramecium octaurelia	320
A0A8S1VWS6	unreviewed	PX domain-containing protein	43137	Paramecium octaurelia	395
A0A8S1W616	unreviewed	PX domain-containing protein	43137	Paramecium octaurelia	275
A0A8S1WLC5	unreviewed	PX domain-containing protein	43137	Paramecium octaurelia	316
A0A8S1XFJ8	unreviewed	PX domain-containing protein	43137	Paramecium octaurelia	388
A0A8S1Y012	unreviewed	PX domain-containing protein	43137	Paramecium octaurelia	320
A0A8S1Y1S7	unreviewed	PX domain-containing protein	43137	Paramecium octaurelia	277
A0A8S1YA18	unreviewed	PX domain-containing protein	43137	Paramecium octaurelia	249
A0A8S1YAS5	unreviewed	PX domain-containing protein	43137	Paramecium octaurelia	548
A0A8S1YBX7	unreviewed	PX domain-containing protein	43137	Paramecium octaurelia	397
A0A8S1YEL3	unreviewed	PX domain-containing protein	43137	Paramecium octaurelia	613
A0A8S1RXK7	unreviewed	PX domain-containing protein	43138	Paramecium pentaurelia	320
A0A8S1SC91	unreviewed	PX domain-containing protein	43138	Paramecium pentaurelia	635
A0A8S1SDG5	unreviewed	PX domain-containing protein	43138	Paramecium pentaurelia	617
A0A8S1T113	unreviewed	PX domain-containing protein	43138	Paramecium pentaurelia	634
A0A8S1T7Q8	unreviewed	Uncharacterized protein	43138	Paramecium pentaurelia	885
A0A8S1TFK2	unreviewed	PX domain-containing protein	43138	Paramecium pentaurelia	654
A0A8S1TR72	unreviewed	PX domain-containing protein	43138	Paramecium pentaurelia	319
A0A8S1U122	unreviewed	PX domain-containing protein	43138	Paramecium pentaurelia	319
A0A8S1U5L0	unreviewed	PX domain-containing protein	43138	Paramecium pentaurelia	318
A0A8S1UK49	unreviewed	PX domain-containing protein	43138	Paramecium pentaurelia	319
A0A8S1V9M2	unreviewed	PX domain-containing protein	43138	Paramecium pentaurelia	320
A0A8S1VGD0	unreviewed	PX domain-containing protein	43138	Paramecium pentaurelia	322
A0A8S1VIU5	unreviewed	PX domain-containing protein	43138	Paramecium pentaurelia	250
A0A8S1VMD8	unreviewed	PX domain-containing protein	43138	Paramecium pentaurelia	320
A0A8S1VWY4	unreviewed	PX domain-containing protein	43138	Paramecium pentaurelia	316
A0A8S1W0R5	unreviewed	PX domain-containing protein	43138	Paramecium pentaurelia	322
A0A8S1WAE7	unreviewed	PX domain-containing protein	43138	Paramecium pentaurelia	277
A0A8S1X8S2	unreviewed	PX domain-containing protein	43138	Paramecium pentaurelia	275
A0A8S1XB26	unreviewed	PX domain-containing protein	43138	Paramecium pentaurelia	249
A0A8S1XSE9	unreviewed	PX domain-containing protein	43138	Paramecium pentaurelia	614
A0A8S1XX67	unreviewed	PX domain-containing protein	43138	Paramecium pentaurelia	388
A0A8S1XZD9	unreviewed	PX domain-containing protein	43138	Paramecium pentaurelia	397
A0A8S1Y878	unreviewed	PX domain-containing protein	43138	Paramecium pentaurelia	613
A0A8S1JUM5	unreviewed	PX domain-containing protein	5886	Paramecium primaurelia	634
A0A8S1K5H7	unreviewed	PX domain-containing protein	5886	Paramecium primaurelia	656
A0A8S1K993	unreviewed	PX domain-containing protein	5886	Paramecium primaurelia	634
A0A8S1KD14	unreviewed	PX domain-containing protein	5886	Paramecium primaurelia	654
A0A8S1KWI5	unreviewed	PX domain-containing protein	5886	Paramecium primaurelia	319
A0A8S1L181	unreviewed	PX domain-containing protein	5886	Paramecium primaurelia	318
A0A8S1LF93	unreviewed	PX domain-containing protein	5886	Paramecium primaurelia	319
A0A8S1LI97	unreviewed	PX domain-containing protein	5886	Paramecium primaurelia	319
A0A8S1LXB9	unreviewed	PX domain-containing protein	5886	Paramecium primaurelia	320
A0A8S1MGQ1	unreviewed	PX domain-containing protein	5886	Paramecium primaurelia	316
A0A8S1MNR0	unreviewed	PX domain-containing protein	5886	Paramecium primaurelia	322
A0A8S1MQV9	unreviewed	PX domain-containing protein	5886	Paramecium primaurelia	320
A0A8S1NHN0	unreviewed	PX domain-containing protein	5886	Paramecium primaurelia	322
A0A8S1NKK9	unreviewed	PX domain-containing protein	5886	Paramecium primaurelia	275
A0A8S1PEU4	unreviewed	PX domain-containing protein	5886	Paramecium primaurelia	277
A0A8S1PNS9	unreviewed	PX domain-containing protein	5886	Paramecium primaurelia	633
A0A8S1PWM0	unreviewed	PX domain-containing protein	5886	Paramecium primaurelia	320
A0A8S1Q0E6	unreviewed	PX domain-containing protein	5886	Paramecium primaurelia	408
A0A8S1Q1G6	unreviewed	PX domain-containing protein	5886	Paramecium primaurelia	250
A0A8S1Q5V7	unreviewed	PX domain-containing protein	5886	Paramecium primaurelia	249
A0A8S1JUX5	unreviewed	PX domain-containing protein	65129	Paramecium sonneborni	635
A0A8S1KGR4	unreviewed	PX domain-containing protein	65129	Paramecium sonneborni	730
A0A8S1KYN8	unreviewed	PX domain-containing protein	65129	Paramecium sonneborni	660
A0A8S1L141	unreviewed	PX domain-containing protein	65129	Paramecium sonneborni	658
A0A8S1LD76	unreviewed	PX domain-containing protein	65129	Paramecium sonneborni	318
A0A8S1M4C0	unreviewed	PX domain-containing protein	65129	Paramecium sonneborni	319
A0A8S1MAZ5	unreviewed	PX domain-containing protein	65129	Paramecium sonneborni	318
A0A8S1MWQ5	unreviewed	PX domain-containing protein	65129	Paramecium sonneborni	322
A0A8S1MZI5	unreviewed	PX domain-containing protein	65129	Paramecium sonneborni	316
A0A8S1N6V8	unreviewed	PX domain-containing protein	65129	Paramecium sonneborni	316
A0A8S1NDC6	unreviewed	PX domain-containing protein	65129	Paramecium sonneborni	320
A0A8S1NRX3	unreviewed	PX domain-containing protein	65129	Paramecium sonneborni	319
A0A8S1NUU4	unreviewed	PX domain-containing protein	65129	Paramecium sonneborni	322
A0A8S1PAI7	unreviewed	PX domain-containing protein	65129	Paramecium sonneborni	323
A0A8S1PJZ2	unreviewed	PX domain-containing protein	65129	Paramecium sonneborni	320
A0A8S1QJN2	unreviewed	PX domain-containing protein	65129	Paramecium sonneborni	382
A0A8S1QV55	unreviewed	PX domain-containing protein	65129	Paramecium sonneborni	275
A0A8S1QVV0	unreviewed	PX domain-containing protein	65129	Paramecium sonneborni	383
A0A8S1QZ17	unreviewed	PX domain-containing protein	65129	Paramecium sonneborni	275
A0A8S1R713	unreviewed	PX domain-containing protein	65129	Paramecium sonneborni	394
A0A8S1R953	unreviewed	PX domain-containing protein	65129	Paramecium sonneborni	610
A0A8S1R9L9	unreviewed	PX domain-containing protein	65129	Paramecium sonneborni	259
A0A8S1RGB1	unreviewed	PX domain-containing protein	65129	Paramecium sonneborni	393
A0A8S1RGM2	unreviewed	PX domain-containing protein	65129	Paramecium sonneborni	951
A0A8S1RGV5	unreviewed	PX domain-containing protein	65129	Paramecium sonneborni	632
A0BMG8	unreviewed	PX domain-containing protein	5888	Paramecium tetraurelia	270
A0BRC6	unreviewed	PX domain-containing protein	5888	Paramecium tetraurelia	398
A0BWX9	unreviewed	PX domain-containing protein	5888	Paramecium tetraurelia	283
A0BXP9	unreviewed	PX domain-containing protein	5888	Paramecium tetraurelia	320
A0BYK0	unreviewed	PX domain-containing protein	5888	Paramecium tetraurelia	316
A0C1B7	unreviewed	PX domain-containing protein	5888	Paramecium tetraurelia	615
A0C221	unreviewed	PX domain-containing protein	5888	Paramecium tetraurelia	794
A0C346	unreviewed	PX domain-containing protein	5888	Paramecium tetraurelia	397
A0C9D8	unreviewed	PX domain-containing protein	5888	Paramecium tetraurelia	629
A0CCF1	unreviewed	PX domain-containing protein	5888	Paramecium tetraurelia	633
A0CE52	unreviewed	PX domain-containing protein	5888	Paramecium tetraurelia	404
A0CPP9	unreviewed	PX domain-containing protein	5888	Paramecium tetraurelia	659
A0CS99	unreviewed	PX domain-containing protein	5888	Paramecium tetraurelia	326
A0CTB2	unreviewed	PX domain-containing protein	5888	Paramecium tetraurelia	316
A0D275	unreviewed	PX domain-containing protein	5888	Paramecium tetraurelia	318
A0D4B6	unreviewed	PX domain-containing protein	5888	Paramecium tetraurelia	319
A0DE60	unreviewed	PX domain-containing protein	5888	Paramecium tetraurelia	249
A0DF55	unreviewed	PX domain-containing protein	5888	Paramecium tetraurelia	316
A0DGG7	unreviewed	PX domain-containing protein	5888	Paramecium tetraurelia	658
A0DJZ1	unreviewed	PX domain-containing protein	5888	Paramecium tetraurelia	635
A0DKF8	unreviewed	PX domain-containing protein	5888	Paramecium tetraurelia	322
A0DV30	unreviewed	PX domain-containing protein	5888	Paramecium tetraurelia	328
A0E0Y3	unreviewed	PX domain-containing protein	5888	Paramecium tetraurelia	322
A0EI39	unreviewed	PX domain-containing protein	5888	Paramecium tetraurelia	320
A0A7J6M4C5	unreviewed	PX domain-containing protein	330153	Perkinsus chesapeaki	804
C5LQJ2	unreviewed	PX domain-containing protein	423536	Perkinsus marinus (strain ATCC 50983 / TXsc)	739
A0A7J6L5R0	unreviewed	PX domain-containing protein	32597	Perkinsus olseni	825
A0A7J6LE11	unreviewed	PX domain-containing protein	32597	Perkinsus olseni	854
A0A7J6PGP5	unreviewed	PX domain-containing protein	32597	Perkinsus olseni	925
A0A3F2S2I1	unreviewed	PX domain-containing protein	325452	Phytophthora kernoviae	380
A0A3F2S424	unreviewed	PX domain-containing protein	325452	Phytophthora kernoviae	1363
A0A3R7HNT1	unreviewed	PX domain-containing protein	325452	Phytophthora kernoviae	380
A0A421F620	unreviewed	PX domain-containing protein	325452	Phytophthora kernoviae	1363
A0A921VG18	unreviewed	Uncharacterized protein	325452	Phytophthora kernoviae	1363
A0A8J4SIN4	unreviewed	PX domain-containing protein	1284355	Phytophthora kernoviae 00238/432	380
A0A8J4SU05	unreviewed	PX domain-containing protein	1284355	Phytophthora kernoviae 00238/432	1363
A0A0W8C9V8	unreviewed	PX domain-containing protein	4790	Phytophthora nicotianae	1199
A0A0G4IP61	unreviewed	PX domain-containing protein	37360	Plasmodiophora brassicae	299
A0A0G4J7A3	unreviewed	PX domain-containing protein	37360	Plasmodiophora brassicae	283
A0A3P3YG29	unreviewed	PX domain-containing protein	37360	Plasmodiophora brassicae	684
A0A3P3YNZ3	unreviewed	PX domain-containing protein	37360	Plasmodiophora brassicae	277
A0A0V0QFN2	unreviewed	PX domain-containing protein	266149	Pseudocohnilembus persalinus	430
A0A0V0QTM8	unreviewed	PX domain-containing protein	266149	Pseudocohnilembus persalinus	728
L5KM03	unreviewed	PX domain-containing protein	9402	Pteropus alecto	193
L7LS10	unreviewed	PX domain-containing protein	72859	Rhipicephalus pulchellus	199
A0A183TLP9	unreviewed	PX domain-containing protein	70667	Schistocephalus solidus	297
A0A0H5R426	unreviewed	PX domain-containing protein	70186	Spongospora subterranea	281
A0A1R2B3X6	unreviewed	PX domain-containing protein	5963	Stentor coeruleus	403
A0A1R2BM80	unreviewed	PX domain-containing protein	5963	Stentor coeruleus	626
A0A1R2BPA4	unreviewed	PX domain-containing protein	5963	Stentor coeruleus	468
A0A1R2BTE0	unreviewed	PX domain-containing protein	5963	Stentor coeruleus	626
A0A1R2CEC8	unreviewed	PX domain-containing protein	5963	Stentor coeruleus	622
A0A1R2CGH7	unreviewed	PX domain-containing protein	5963	Stentor coeruleus	605
A0A1R2CXZ2	unreviewed	PX domain-containing protein	5963	Stentor coeruleus	361
A0A1R2D1J8	unreviewed	PX domain-containing protein	5963	Stentor coeruleus	532
A0A1R2D3M0	unreviewed	PX domain-containing protein	5963	Stentor coeruleus	601
A0A077ZQE1	unreviewed	PX domain-containing protein	5949	Stylonychia lemnae	783
A0A078A3Y0	unreviewed	PX domain-containing protein	5949	Stylonychia lemnae	727
A0A078AF30	unreviewed	PX domain-containing protein	5949	Stylonychia lemnae	1481
A0A2B4SY03	unreviewed	PX domain-containing protein	50429	Stylophora pistillata	809
I7LTL9	unreviewed	PX domain-containing protein	312017	Tetrahymena thermophila (strain SB210)	795
I7M639	unreviewed	PX domain-containing protein	312017	Tetrahymena thermophila (strain SB210)	412
Q22SF3	unreviewed	PX domain-containing protein	312017	Tetrahymena thermophila (strain SB210)	387
Q23VB5	unreviewed	PX domain-containing protein	312017	Tetrahymena thermophila (strain SB210)	708
A0A0L0DMC6	unreviewed	PX domain-containing protein	461836	Thecamonas trahens ATCC 50062	389
A0A1W0A1X4	unreviewed	PX domain-containing protein	74557	Thraustotheca clavata	1048
A0A1W0A8N5	unreviewed	PX domain-containing protein	74557	Thraustotheca clavata	504
A0A3R7L2S8	unreviewed	PX domain-containing protein	83891	Trypanosoma conorhini	593
A0A2V2V2E1	unreviewed	PX domain-containing protein	5693	Trypanosoma cruzi	584
A0A2V2VFT3	unreviewed	PX domain-containing protein	5693	Trypanosoma cruzi	589
A0A2V2WEX7	unreviewed	PX domain-containing protein	5693	Trypanosoma cruzi	590
A0A7J6Y303	unreviewed	PX domain-containing protein	5693	Trypanosoma cruzi	591
Q4DW43	unreviewed	PX domain-containing protein	353153	Trypanosoma cruzi (strain CL Brener)	590
V5BFS0	unreviewed	PX domain-containing protein	1416333	Trypanosoma cruzi Dm28c	584
A0A422NLT1	unreviewed	PX domain-containing protein	5698	Trypanosoma rangeli	597
A0A061ITV6	unreviewed	PX domain-containing protein	429131	Trypanosoma rangeli SC58	673
A0A1X0NKZ7	unreviewed	PX domain-containing protein	67003	Trypanosoma theileri	607
L9L7H3	unreviewed	PX domain-containing protein	246437	Tupaia chinensis	486
A0A8K1LF60	unreviewed	PX domain-containing protein	364589	Zosterops borbonicus	215
